# Supplementary material for: Primary central nervous system CD20-negative diffuse large B-cell lymphoma: A case report
Source: Research Square preprint supplement (doi:10.21203/rs.3.rs-1665565/v1), 2022-05-20
Supplement: Supplementary file 1 [file e8316416f52f76228fd2aa63.xlsx]

## Sheet: Sheet1
Table 1. Gene mutations detected with NGS
Gene	Type	Allele Frequency（%）	Coding	Protein	Function	Transcript	Locus
BTG2	SNV	64.96	|c.19A>G	|p.Thr7Ala	|missense	NR_034151.1|NM_006763.2	chr1:203274753
ITPKB	SNV	70.99	c.964G>A	p.Ala322Thr	missense	NM_002221.3	chr1:226924196
TET2	SNV	42.44	c.3116C>T|	p.Ser1039Leu|	missense|	NM_001127208.2|NR_126420.1	chr4:106158215
FAT1	SNV	27.94	c.9514T>C	p.Phe3172Leu	missense	NM_005245.3	chr4:187532879
FAT1	SNV	25.8	c.6156A>C	p.Glu2052Asp	missense	NM_005245.3	chr4:187541584
PIM1	SNV	35.92	c.202C>T	p.His68Tyr	missense	NM_002648.3	chr6:37138769
CARD11	SNV	27.78	c.1010G>A	p.Arg337Gln	missense	NM_032415.5	chr7:2978320
CARD11	SNV	26.91	c.739A>G	p.Arg247Gly	missense	NM_032415.5	chr7:2979508
KMT2C	SNV	54.56	c.2512G>A	p.Gly838Ser	missense	NM_170606.2	chr7:151945007
NOTCH1	SNV	32.78	c.5476G>A	p.Glu1826Lys	missense	NM_017617.4	chr9:139396362
KMT2D	SNV	61.97	c.10045A>G	p.Met3349Val	missense	NM_003482.3	chr12:49431094
SOCS1	SNV	33.75	c.7G>C	p.Ala3Pro	missense	NM_003745.1	chr16:11349329
BCORL1	SNV	98.43	c.331T>C	p.Phe111Leu	missense	NM_021946.4	chrX:129147079
